# Supplementary material
Source: PubMed Central journal article supplement (PMC4702156)
Supplement: DS_10.1177_1941738115608361.pdf [file DS_10.1177_1941738115608361.pdf]

#

**Appendix 1.** Comparison Between Test Subjects and Matched Controls

| Characteristic       | Operative Test Group (n = 25) | Operative Control Group (n = 50) | <i>P</i> | Nonoperative Test Group (n = 17) | Nonoperative Control Group (n = 34) | <i>P</i> |
|----------------------|-------------------------------|----------------------------------|----------|----------------------------------|-------------------------------------|----------|
| Mean age, y          | 26.76 ± 2.51                  | 27.14 ± 2.94                     | 0.581    | 27.53 ± 3.69                     | 27.62 ± 3.63                        | 0.935    |
| Mean height, in      | 79.84 ± 2.69                  | 79.46 ± 3.06                     | 0.600    | 80.18 ± 3.76                     | 79.50 ± 3.86                        | 0.555    |
| Mean weight, lbs     | 221.12 ± 27.09                | 219.72 ± 26.82                   | 0.832    | 229.00 ± 29.41                   | 225.65 ± 27.97                      | 0.693    |
| Mean BMI             | 24.32 ± 1.99                  | 24.49 ± 1.78                     | 0.884    | 24.94 ± 1.57                     | 25.03 ± 1.88                        | 0.866    |
| Position             |                               |                                  |          |                                  |                                     |          |
| PG (n, %)            | 2 (8.0)                       | 7 (14.0)                         | 0.709    | 3 (17.6)                         | 7 (20.6)                            | 0.999    |
| SG (n, %)            | 4 (16.0)                      | 8 (32.0)                         | 0.999    | 3 (17.6)                         | 3 (8.8)                             | 0.387    |
| SF (n, %)            | 8 (32.0)                      | 15 (30.0)                        | 0.999    | 1 (5.9)                          | 6 (17.6)                            | 0.401    |
| PF (n, %)            | 8 (32.0)                      | 10 (20.0)                        | 0.266    | 4 (23.5)                         | 6 (17.6)                            | 0.714    |
| C (n, %)             | 3 (12.0)                      | 10 (20.0)                        | 0.524    | 6 (35.3)                         | 12 (35.3)                           | 0.999    |
| GP                   | 67.60 ± 14.62                 | 61.64 ± 19.54                    | 0.189    | 64.18 ± 15.32                    | 66.74 ± 19.19                       | 0.635    |
| GS                   | 32.52 ± 28.77                 | 33.82 ± 29.85                    | 0.858    | 35.06 ± 33.74                    | 40.09 ± 29.97                       | 0.590    |
| PER                  | 13.74 ± 3.63                  | 13.40 ± 4.13                     | 0.729    | 14.67 ± 3.56                     | 14.07 ± 3.65                        | 0.580    |
| MPG                  | 24.22 ± 8.38                  | 24.42 ± 9.81                     | 0.931    | 23.24 ± 10.13                    | 25.34 ± 9.43                        | 0.468    |
| Points per 36 min    | 14.07 ± 2.69                  | 14.63 ± 5.60                     | 0.641    | 15.29 ± 4.73                     | 14.16 ± 3.12                        | 0.309    |
| FG per 36 min        | 5.20 ± 1.01                   | 5.63 ± 2.06                      | 0.334    | 5.89 ± 1.74                      | 5.34 ± 1.31                         | 0.210    |
| FGA per 36 min       | 11.48 ± 1.65                  | 12.44 ± 4.33                     | 0.172    | 12.34 ± 3.45                     | 10.42 ± 3.61                        | 0.085    |
| FG percentage        | 45.25 ± 6.00                  | 45.02 ± 6.15                     | 0.877    | 46.53 ± 5.70                     | 45.78 ± 6.41                        | 0.684    |
| 3P per 36 min        | 1.01 ± 1.57                   | 0.63 ± 0.90                      | 0.274    | 0.54 ± 0.75                      | 0.44 ± 0.70                         | 0.645    |
| 3PA per 36 min       | 2.34 ± 2.83                   | 1.74 ± 2.34                      | 0.338    | 1.64 ± 2.20                      | 1.07 ± 1.67                         | 0.305    |
| 3P percentage        | 34.93 ± 5.06                  | 37.27 ± 4.22                     | 0.216    | 31.08 ± 7.99                     | 34.36 ± 7.89                        | 0.356    |
| FT per 36 min        | 2.90 ± 1.39                   | 2.76 ± 1.50                      | 0.699    | 2.88 ± 1.46                      | 3.01 ± 1.33                         | 0.758    |
| FTA per 36 min       | 4.10 ± 2.36                   | 3.80 ± 1.97                      | 0.557    | 4.00 ± 1.60                      | 5.35 ± 3.60                         | 0.160    |
| FT percentage        | 75.62 ± 9.30                  | 72.41 ± 10.77                    | 0.208    | 73.82 ± 9.34                     | 72.96 ± 8.30                        | 0.740    |
| Rebounds per 36 min  | 6.65 ± 2.44                   | 6.51 ± 2.79                      | 0.826    | 6.67 ± 2.86                      | 6.70 ± 2.90                         | 0.963    |
| Assists per 36 min   | 2.50 ± 1.43                   | 2.84 ± 2.49                      | 0.534    | 2.83 ± 2.41                      | 3.00 ± 1.79                         | 0.774    |
| Steals per 36 min    | 1.11 ± 0.45                   | 1.22 ± 0.73                      | 0.527    | 1.02 ± 0.64                      | 1.10 ± 0.46                         | 0.622    |
| Blocks per 36 min    | 0.68 ± 0.60                   | 0.96 ± 0.88                      | 0.108    | 1.11 ± 0.85                      | 0.95 ± 0.88                         | 0.532    |
| Turnovers per 36 min | 2.04 ± 0.75                   | 2.21 ± 0.88                      | 0.409    | 2.27 ± 0.79                      | 2.18 ± 0.74                         | 0.689    |
| Fouls per 36 min     | 3.79 ± 1.35                   | 3.90 ± 1.58                      | 0.774    | 4.02 ± 1.35                      | 3.88 ± 1.70                         | 0.782    |
| Usage percentage     | 19.02 ± 3.06                  | 19.30 ± 4.50                     | 0.758    | 20.30 ± 7.00                     | 19.39 ± 4.04                        | 0.556    |

#

#

3P, 3 pointers; 3PA, 3-point attempt; BMI, body mass index; C, center; FG, field goals; FT, free throws; FTA, free throw attempt; GP, games played; GS, games started; MPG, minutes per game; PER, player efficiency rating; PF, power forward; PG, point guard, SF, small forward; SG, shooting guard.
